# Supplementary material for: PP2A:B56ϵ is required for Wnt/β-catenin signaling during embryonic development
Source: Oxford University Press journal article supplement (doi:10.1242/dev.00762), 2003-10-07
Supplement: dev00762-sup-supptable.pdf [file dev00762-sup-supptable.pdf]

**Table S1. PP2A:B56 $\epsilon$  blocks secondary axis induced by  $\beta$ -catenin and Xtcf3-VP16, but not by siamois and Xtwin**

| mRNA injected                                         | Axis duplication(%) | Normal axis(%) | <i>n</i> |
|-------------------------------------------------------|---------------------|----------------|----------|
| $\beta$ -catenin (250pg)                              | 69                  | 31             | 74       |
| $\beta$ -catenin (250pg)+PP2A:B56 $\epsilon$ ( 100pg) | 4                   | 96             | 50       |
| Xtcf3-VP16 (0.5pg)                                    | 93                  | 7              | 68       |
| Xtcf3-Vp16 (0.5pg)+PP2A:B56 $\epsilon$ (100pg)        | 6                   | 94             | 63       |
| Siamois (10pg)                                        | 48                  | 52             | 85       |
| Siamois (10pg)+PP2A:B56 $\epsilon$ (100pg)            | 49                  | 40             | 78       |
| Xtwin (5pg)                                           | 97                  | 3              | 71       |
| Xtwin (5pg)+PP2A:B56 $\epsilon$ (100pg)               | 96                  | 4              | 85       |

$\beta$ -catenin, Xtcf3-VP16, siamois and Xtwin induce secondary axis if the respective mRNAs are injected ventrally at the four-cell stage. PP2A:B56 $\epsilon$  (100pg) inhibits secondary axis induced by  $\beta$ -catenin and Xtcf3-VP16, but not by siamois and Xtwin [as reported by (Ratcliffe et al., 2000) and similar to overexpression of P2A:B56 $\alpha$  (Li et al., 2001)].
